# Supplementary material
Source: MDPI journal article supplement (https://www.mdpi.com/2297-8739/11/2/41)
Supplement: s1 [file s1 › separations-2844903-supplementary.pdf]

Supplementary Information

**An LC-MS/MS Method for the Simultaneous Quantification of Insulin, Cortisol, Glucagon-like peptide 1, Ghrelin, and Osteocalcin**

Zhichao Zhang<sup>1 ‡</sup>, Hareem Siddiqi<sup>1 ‡</sup>, Yu-Ping Huang<sup>2</sup>, Shannon M<sup>c</sup>Clorry<sup>1</sup>, Peng Ji<sup>1</sup>, Daniela Barile<sup>2</sup> and Carolyn M. Slupsky<sup>1&2\*</sup>

<sup>1</sup>Department of Nutrition, University of California, Davis, Davis, CA, USA 95616

<sup>2</sup>Department of Food Science & Technology, University of California, Davis, Davis, CA, USA, 95616

\*Corresponding author: Carolyn M. Slupsky, [cslupsky@ucdavis.edu](mailto:cslupsky@ucdavis.edu); tel: 530-752-6804; fax: 530-752-8966.

<sup>‡</sup> These authors contributed equally.

**Table S1.** Diluents used for hormones standards.

| <b>Hormone</b>           | <b>Diluent</b>                               | <b>Hormone</b>           | <b>Diluent</b>                      |
|--------------------------|----------------------------------------------|--------------------------|-------------------------------------|
| Porcine insulin          | 0.2% formic acid in ultrapure water          | Human insulin            | 0.2% formic acid in ultrapure water |
| Porcine osteocalcin      | 0.2% formic acid in ultrapure water          | Human osteocalcin        | 3% ammonia water                    |
| Porcine ghrelin          | 0.3% acetic acid in ultrapure water          | Human ghrelin            | Ultrapure water                     |
| Porcine des-acyl ghrelin | 0.3% acetic acid in ultrapure water          | Human des-acyl ghrelin   | Ultrapure water                     |
| GLP-1 (7-36)             | 80:20:0.1 H <sub>2</sub> O:MeOH: formic acid | Methyl GLP-1 (7-36)      | Ultrapure water                     |
| GLP-1 (7-37)             | DMSO                                         | Methyl GLP-1 (7-37)      | 3% ammonia water                    |
| Cortisol                 | MeOH                                         | d <sub>4</sub> -Cortisol | MeOH                                |

**Table S2.** Expanded parameters for external and internal standard ions monitored using dynamic MRM.

|                                | Precursor ion | Product ion | Retention time (min) | Fragmentor voltage (V) | Collision Energy (eV) | Cell Accelerator (V) |
|--------------------------------|---------------|-------------|----------------------|------------------------|-----------------------|----------------------|
| External standard ions         |               |             |                      |                        |                       |                      |
| Cortisol                       | 363.2         | 121.0       | 20.1                 | 160                    | 30                    | 4                    |
| Pig des-acyl ghrelin           | 639.1         | 84.0        | 10.1                 | 160                    | 100                   | 4                    |
| Pig ghrelin                    | 553.9         | 84.0        | 13.5                 | 140                    | 90                    | 4                    |
| Pig carboxylated osteocalcin   | 1145.4        | 1115.3      | 21.2                 | 160                    | 100                   | 4                    |
| GLP-1 (7-36)                   | 660.6         | 660.6       | 19.7                 | 135                    | 0                     | 4                    |
| GLP-1 (7-37)                   | 672.1         | 84.1        | 20.1                 | 140                    | 120                   | 4                    |
| Pig insulin                    | 1155.7        | 86.0        | 20.2                 | 160                    | 30                    | 4                    |
| Internal standard ions         |               |             |                      |                        |                       |                      |
| d4-Cortisol                    | 367.2         | 121.0       | 20.1                 | 140                    | 26                    | 4                    |
| Human des-acyl ghrelin         | 541.5         | 70.0        | 10.6                 | 120                    | 40                    | 4                    |
| Human ghrelin                  | 562.5         | 70.0        | 13.9                 | 120                    | 40                    | 4                    |
| Human carboxylated osteocalcin | 1186.9        | 1186.9      | 19.9                 | 135                    | 0                     | 4                    |
| Methyl GLP-1 (7-36)            | 663.5         | 72.1        | 19.7                 | 135                    | 100                   | 4                    |
| Methyl GLP-1 (7-37)            | 674.9         | 84.1        | 20.1                 | 140                    | 120                   | 4                    |
| Human insulin                  | 1161.7        | 1158.5      | 19.7                 | 160                    | 30                    | 4                    |

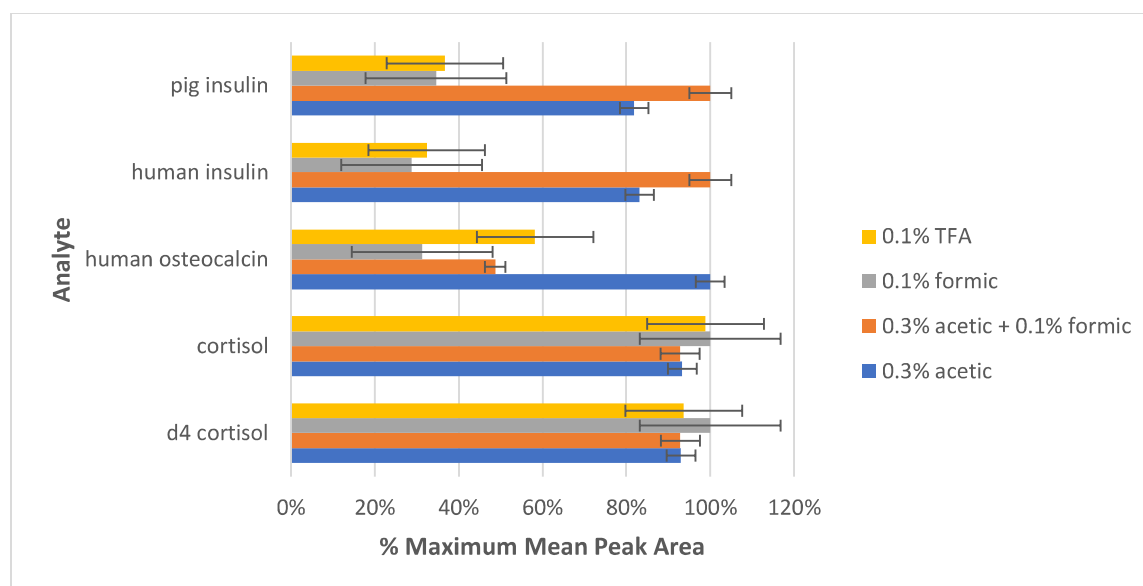

**Figure S1. Relative signal intensity of hormones extracted with four types of acids.** Pig serum was spiked with QC1 concentrations of the available analytes and extracted using 75% ACN with the four following acids: 0.1% TFA, 0.1% formic acid, a combination of 0.3% acetic acid and 0.1% formic acid, or 0.3% acetic acid. Analysis was performed in triplicate and the average peak area is visualized in the figure. No single pH modifier provided maximum signal intensity for all analytes. While cortisol was largely unaffected by acid type, signal intensity of des-acyl and acyl ghrelin and osteocalcin were much lower with 0.1% TFA or 0.1% formic acid. The combination of acetic and formic acid was also not suitable for osteocalcin, thus acetic acid was considered for future trials.

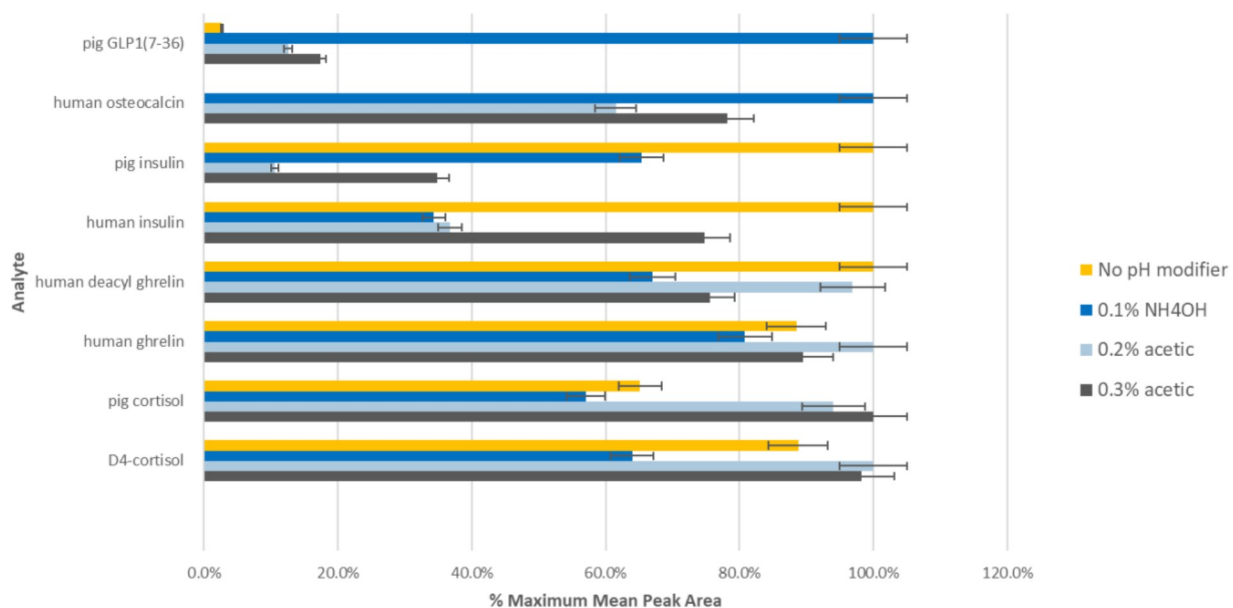

**Figure S2. Relative signal intensity of spiked serum samples extracted with either no pH modifier, 0.1% NH<sub>4</sub>OH, 0.2% acetic acid, or 0.3% acetic acid.** Pig serum was spiked with QC1 concentrations of the available analytes and extracted using the four different protein precipitation solvents. Analysis was performed in triplicate and the average peak area with SD was visualized in the figure. No single pH modifier provided maximum signal intensity for all analytes.

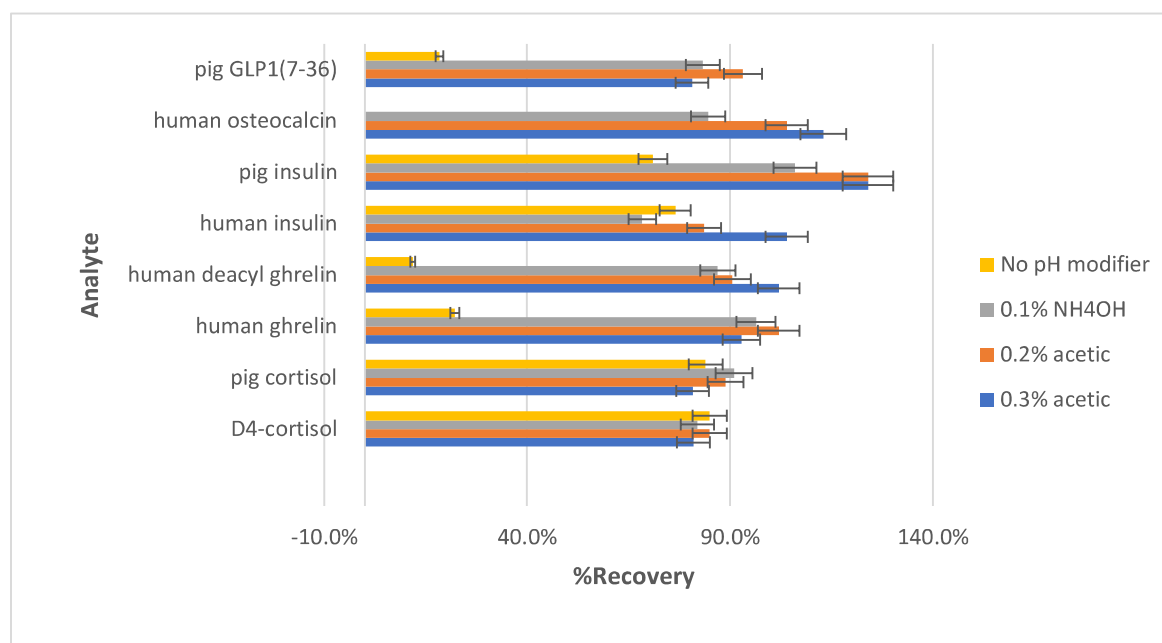

**Figure S3. Recovery of spiked serum samples extracted with different pH modifiers.** Pig serum was spiked with QC1 concentrations of the available analytes either before or after extraction. Samples were extracted using the four different pH modified protein precipitation solvents. %Recovery was calculated as the ratio of the signal intensity of samples spiked before extraction versus after extraction. All conditions were run in triplicate and the average %recovery with SD was visualized in the figure. No single pH modifier provided optimal recovery for all analytes.

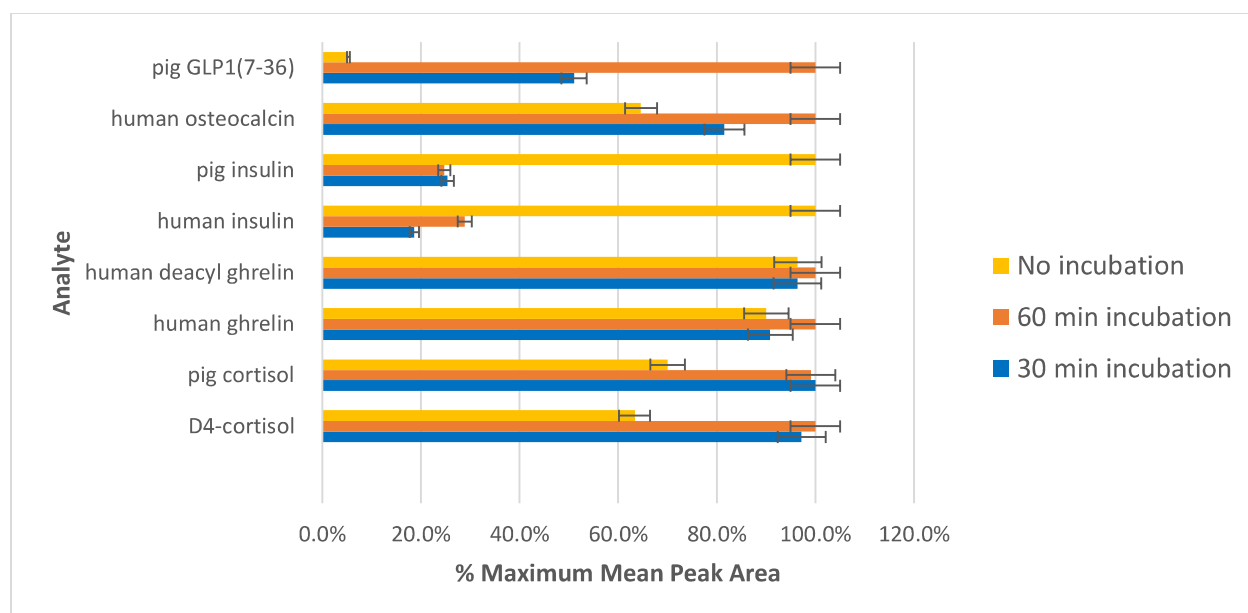

**Figure S4. Relative signal intensity of samples incubated with acetonitrile for 0, 30, or 60 minutes.** Pig serum was spiked with QC1 concentrations of the available analytes and extracted using 0.2% acetic acid in 75% ACN. The serum and protein precipitation solvent mixtures were incubated at 4°C for 0, 30, or 60 minutes. All conditions were performed in triplicate and the average peak area with SD was visualized in the figure.

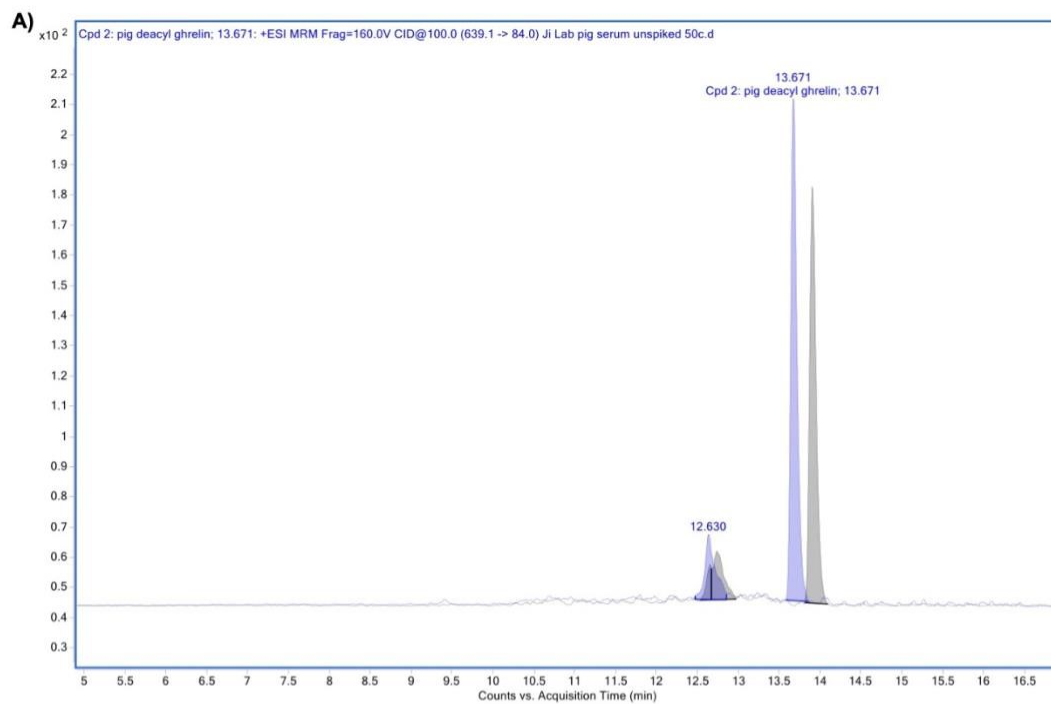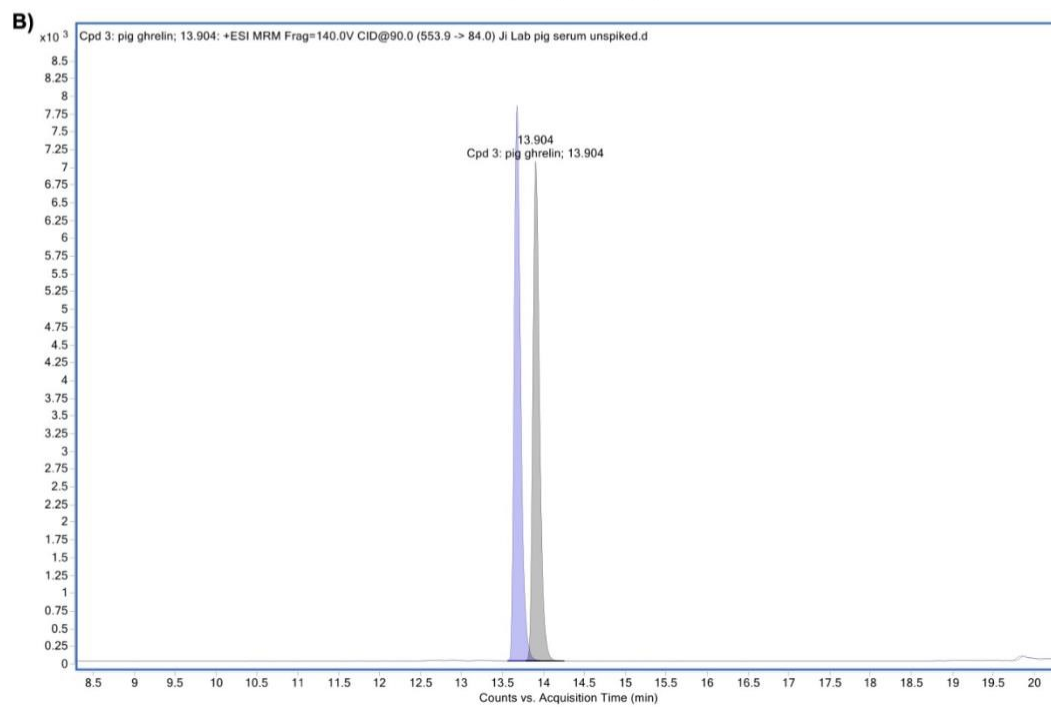

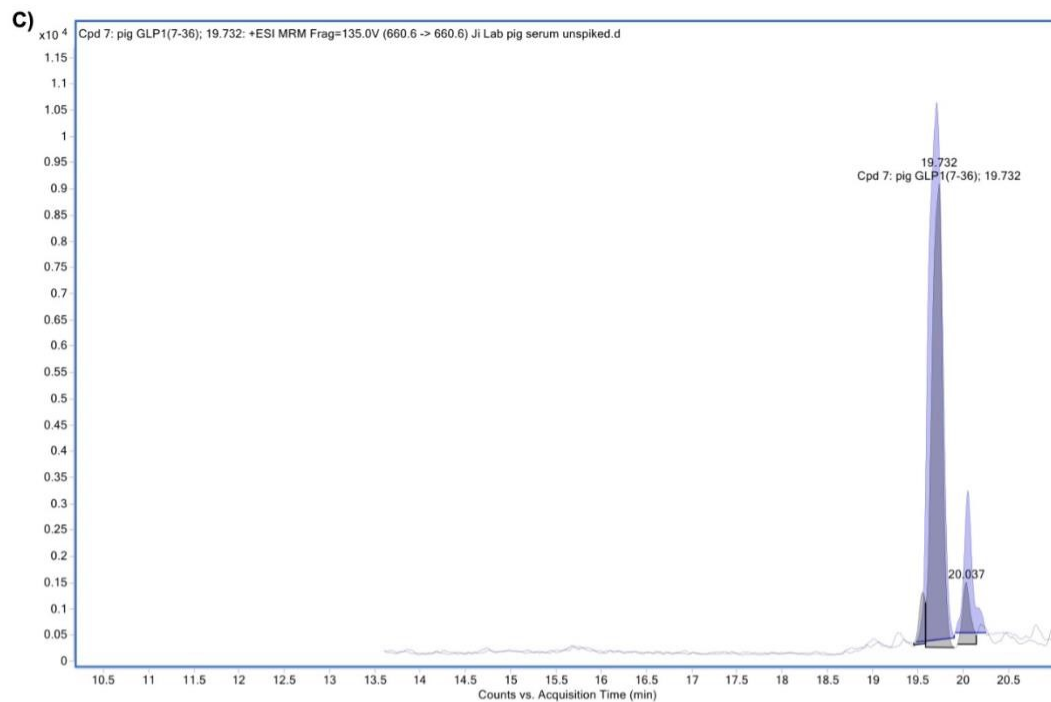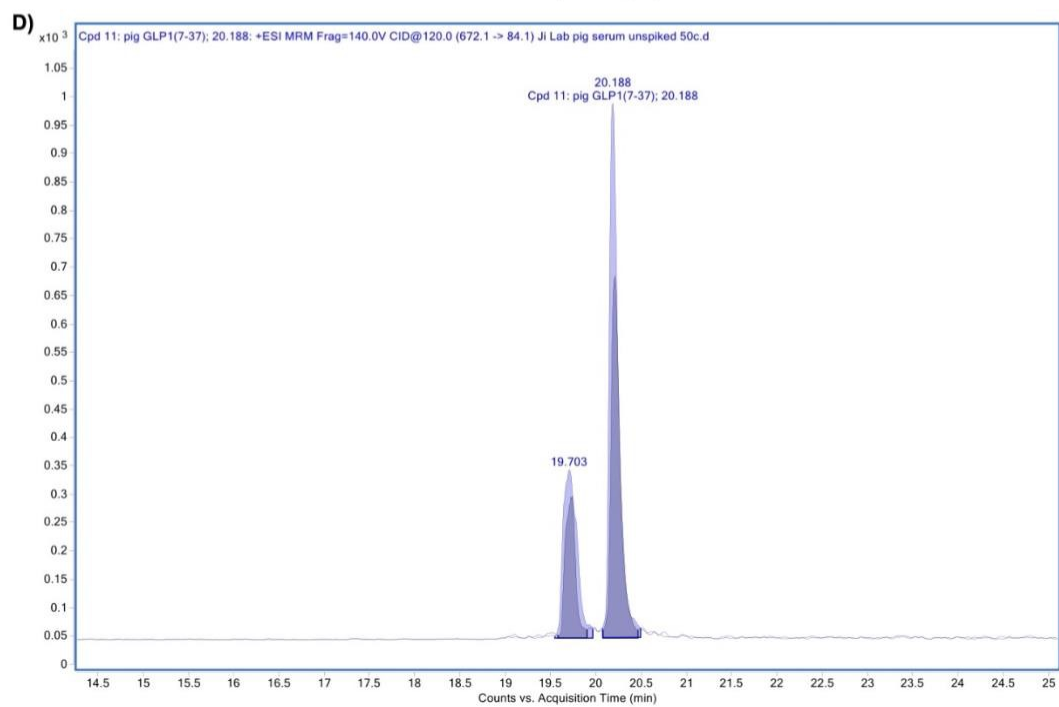

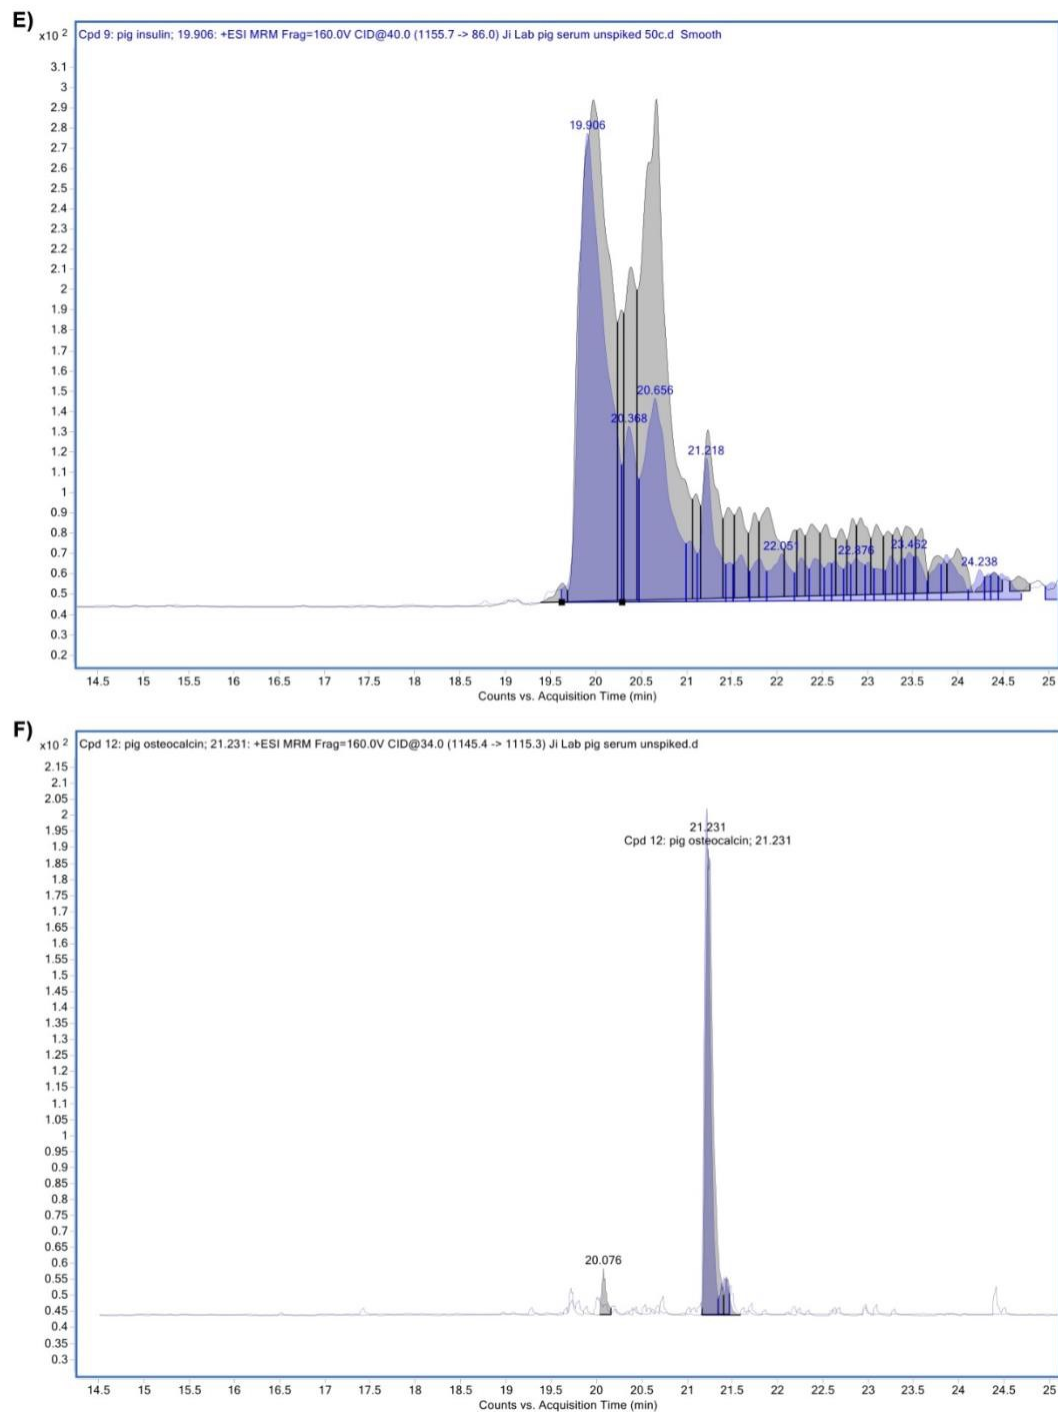

**Figure S5. Analyte chromatograms before and after column temperature change.** Chromatograms for (A) des-acyl ghrelin, (B) acyl ghrelin, (C) GLP-1 (7-36), (D) GLP-1(7-37), (E) insulin, and (F) osteocalcin in pig serum. The same aliquot of pig serum extract was run under a column temperature of 35 °C (shown in black) and 50 °C (shown in blue). Comparison of peak height showed greater signal intensity with higher column temperature. Insulin (shown in E) also demonstrated a sharper peak shape with 50 °C column temperature.

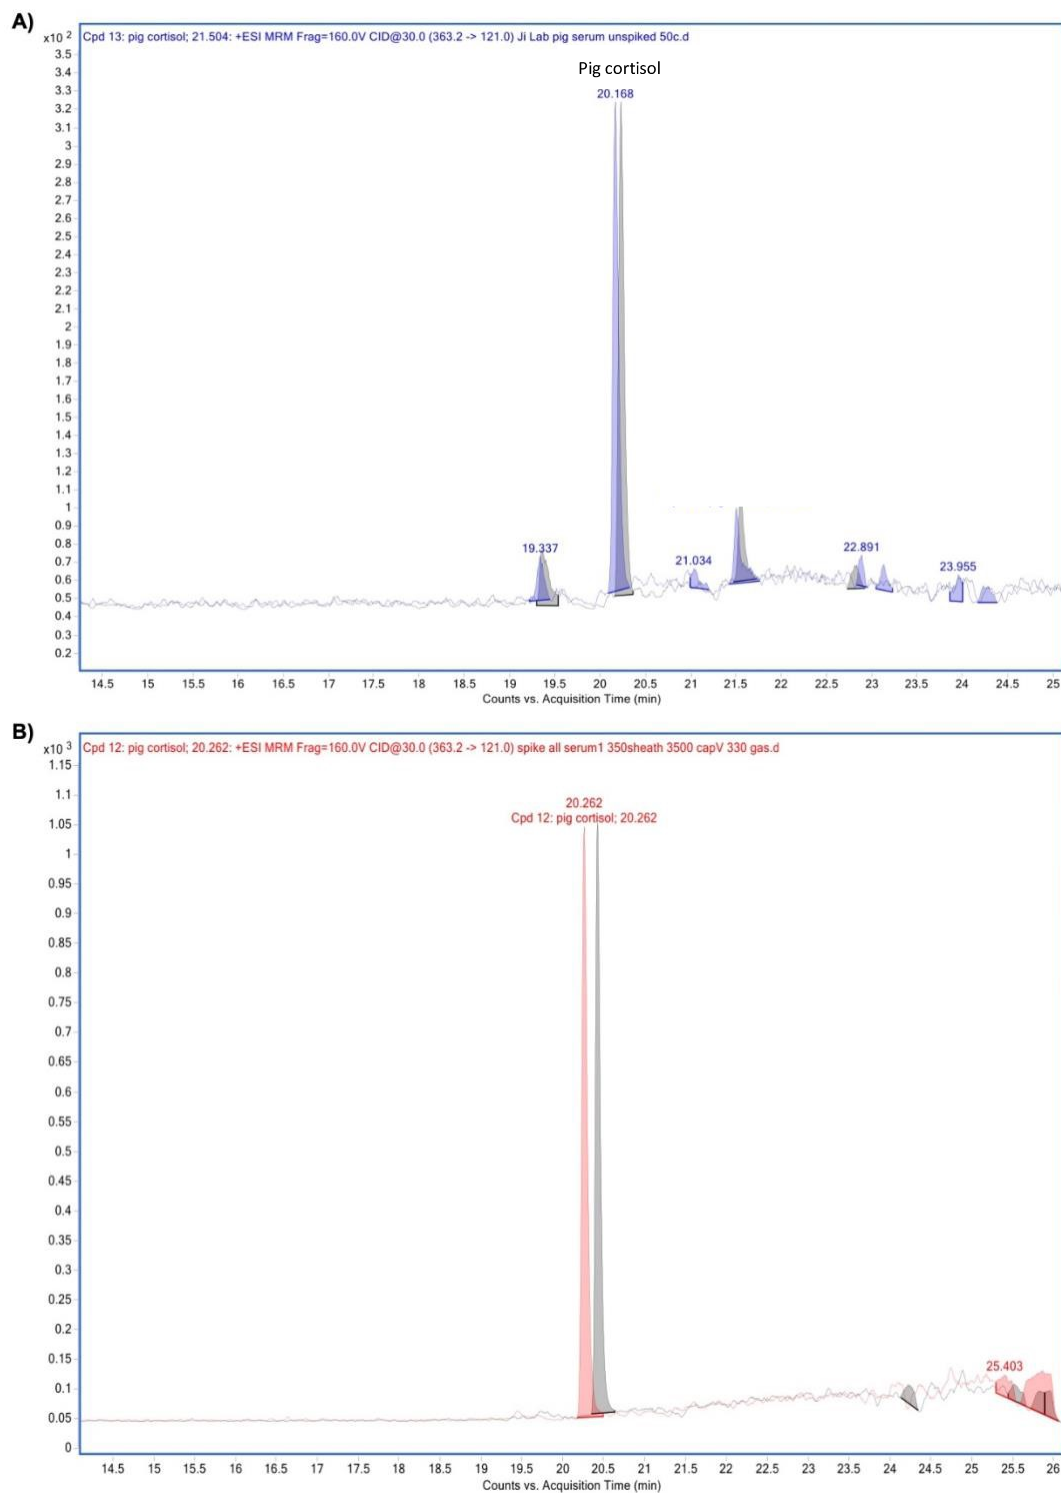

**Figure S6. Cortisol chromatograms before and after LC-MS optimization.** Chromatograms for cortisol (A) before and after column temperature change from 35°C to 50°C and (B) before and after increase of gas temperature and sheath gas temperature. The peaks in grey indicate cortisol signal prior to optimization. Optimization of LC-MS temperatures did not visibly impact cortisol peak shape and height.

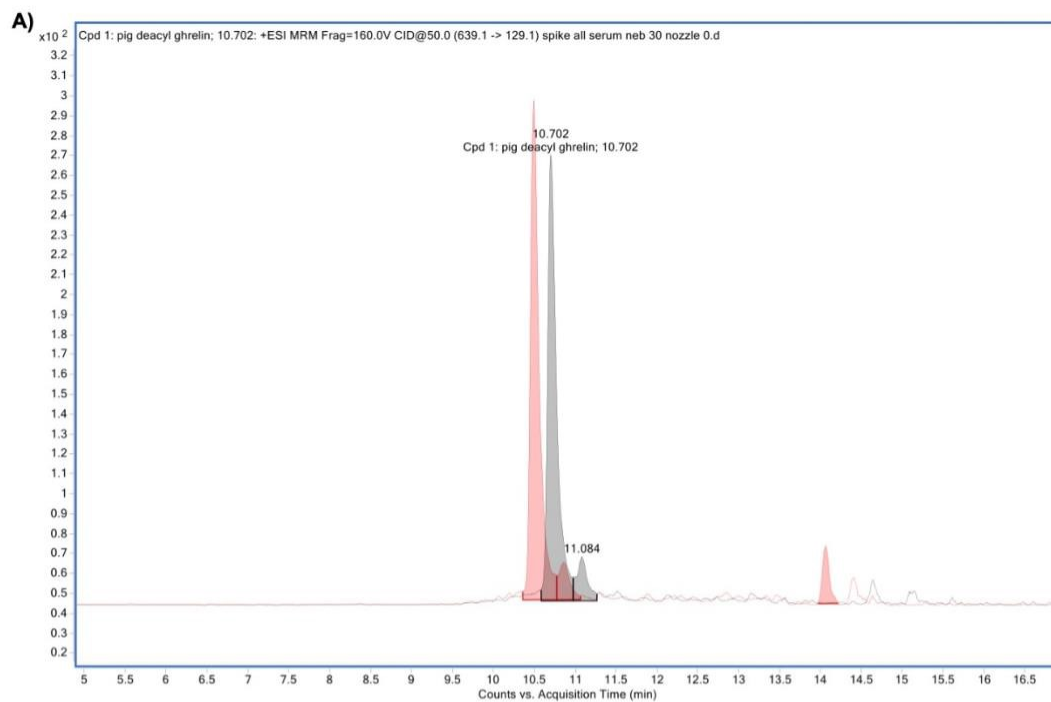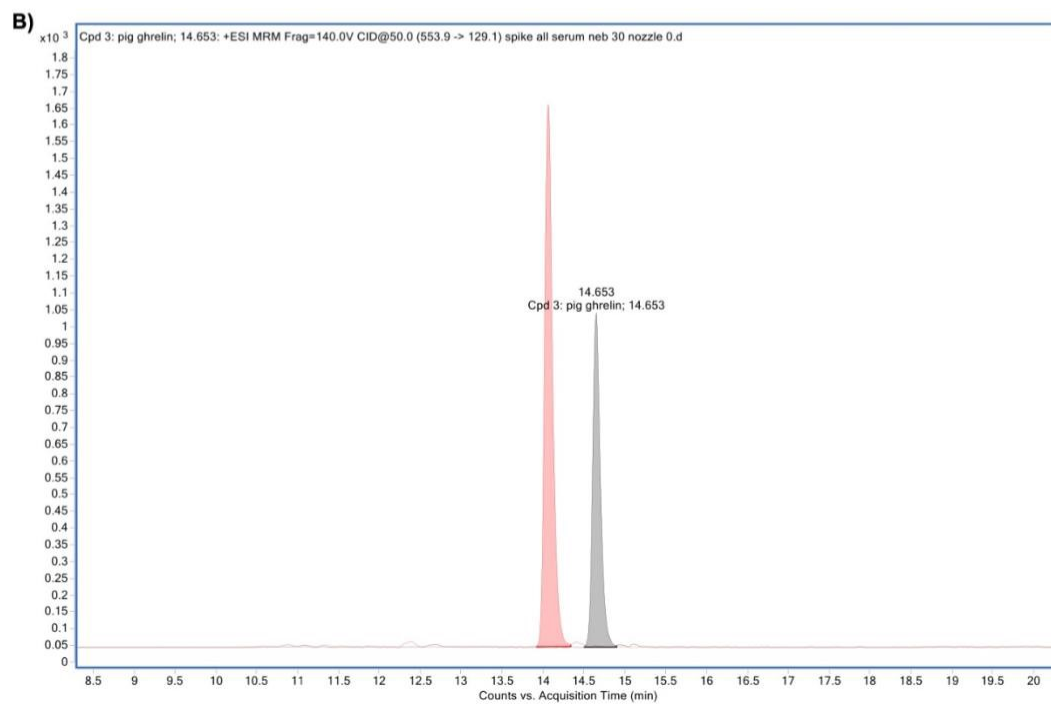

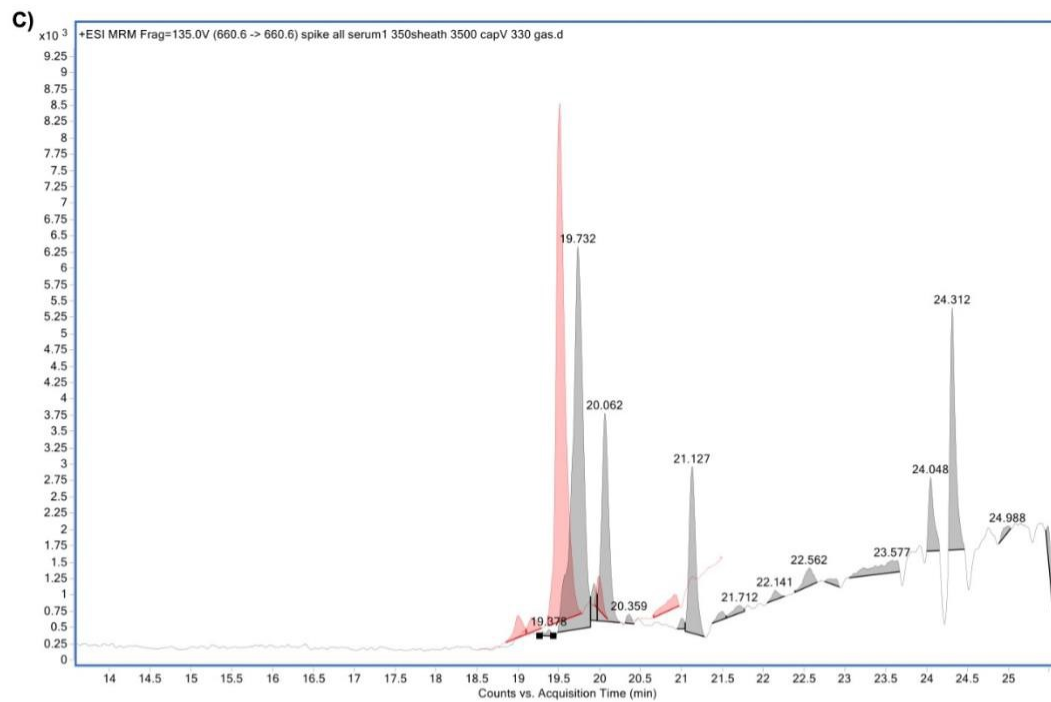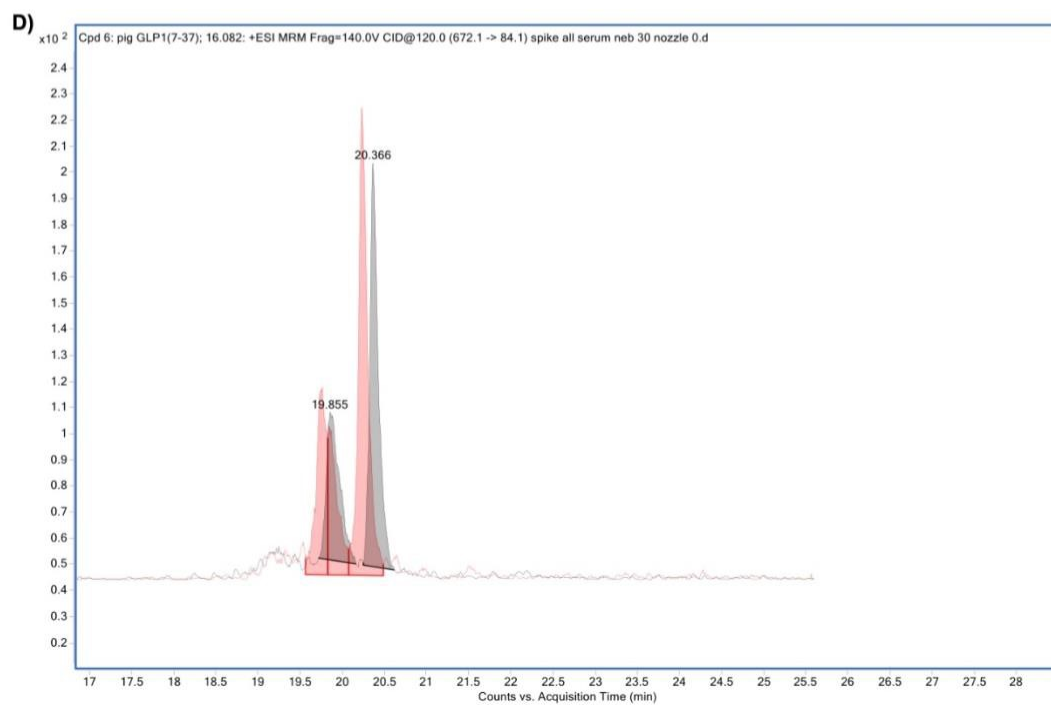

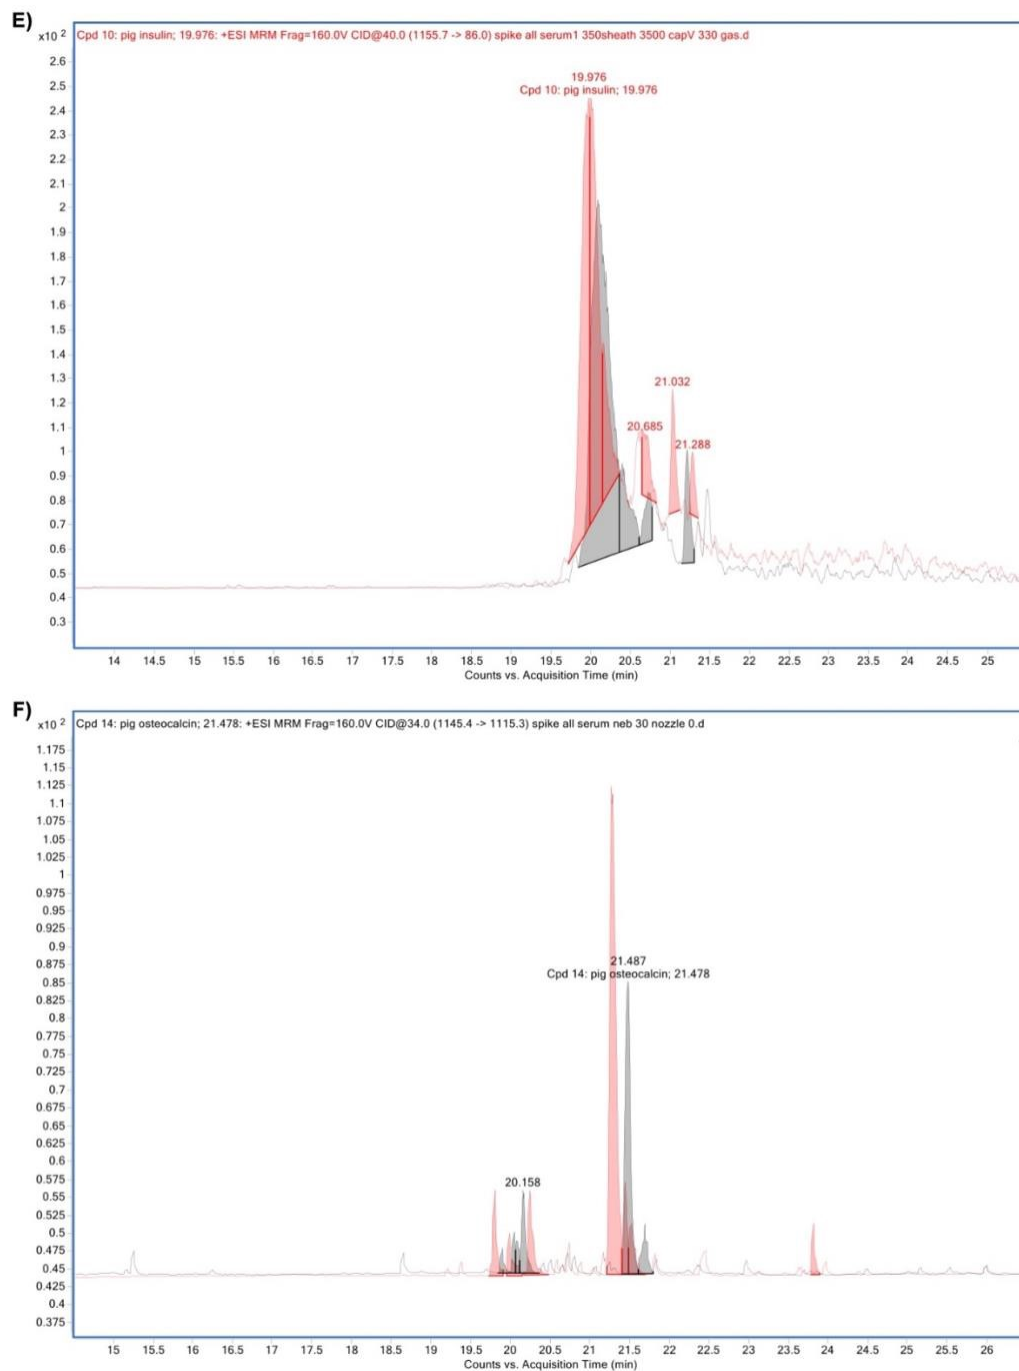

**Figure S7. Analyte chromatograms before and after an increase in sheath gas and gas temperature.** Chromatograms for (A) des-acyl ghrelin, (B) acyl ghrelin, (C) GLP-1 (7-36), (D) GLP-1(7-37), (E) insulin, and (F) osteocalcin from pig serum. The same aliquot of pig serum extract was run under conditions of sheath gas temperature 300 °C and gas temperature 290 °C (shown in black) versus sheath gas temperature 350 °C and gas temperature of 330 °C (shown in red). Comparison of peak height shows greater signal intensity with higher temperature. GLP-1 (7-36) (shown in C) demonstrated increased S:N in MS conditions with higher temperatures.

**A)** pig deacyl ghrelin - 8 Levels, 8 Levels Used, 8 Points, 8 Points Used, 0 QCs

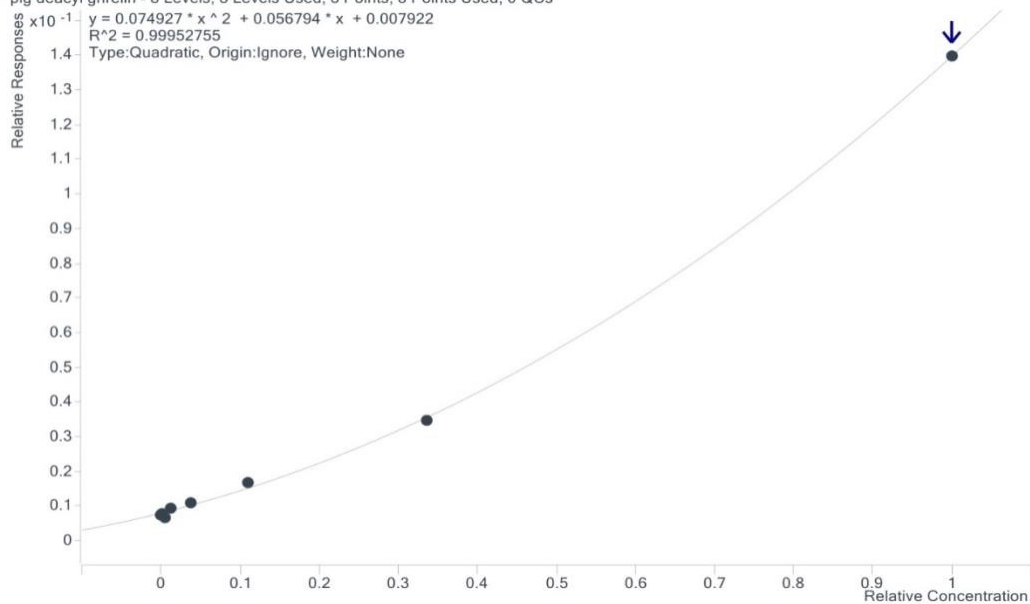

**B)** pig ghrelin - 8 Levels, 8 Levels Used, 8 Points, 8 Points Used, 0 QCs

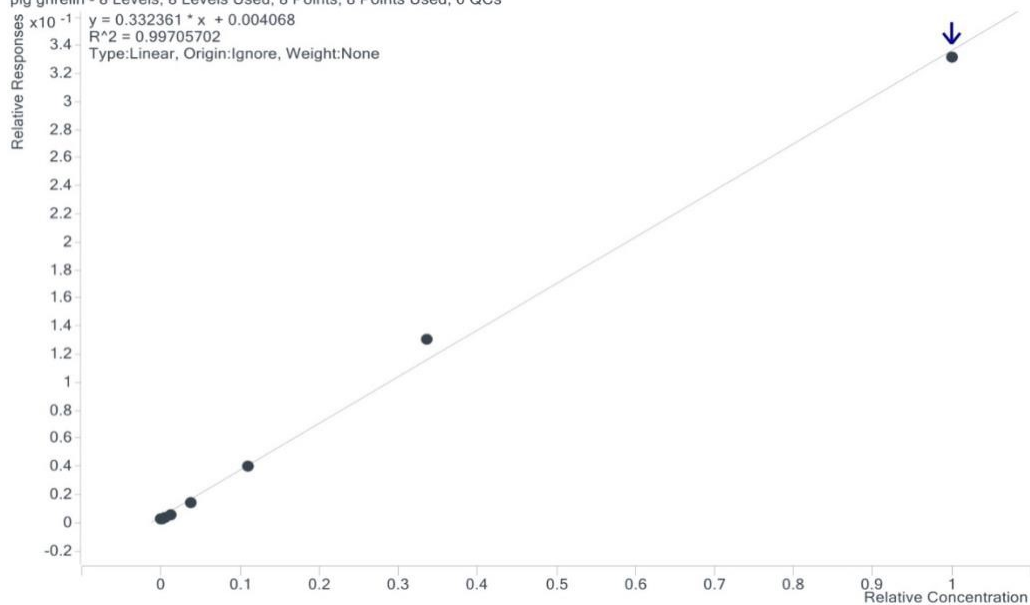

c) pig GLP1(7-36) - 8 Levels, 7 Levels Used, 8 Points, 7 Points Used, 0 QCs

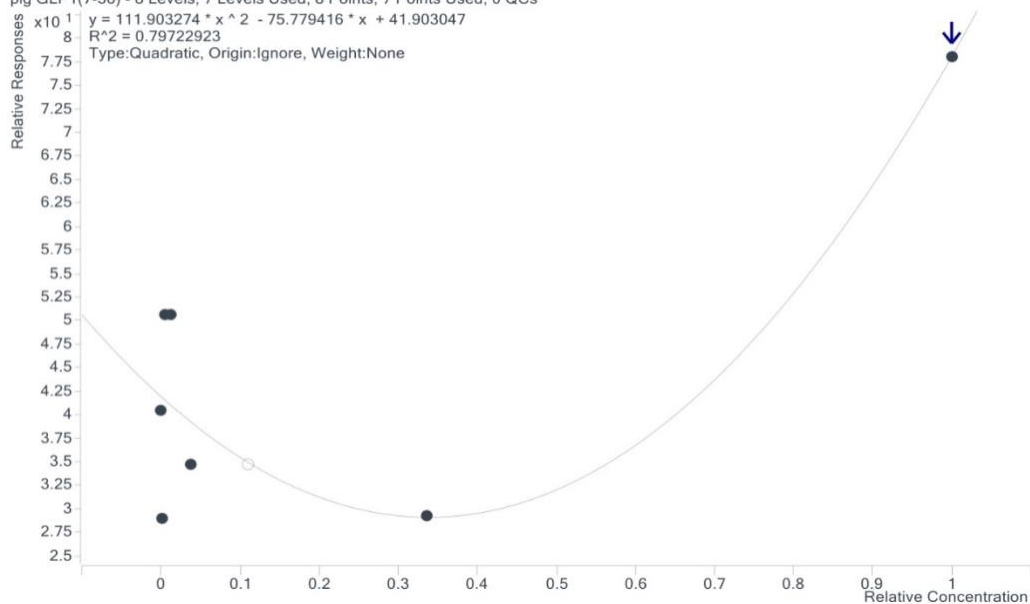

D) pig GLP1(7-37) - 8 Levels, 8 Levels Used, 8 Points, 8 Points Used, 0 QCs

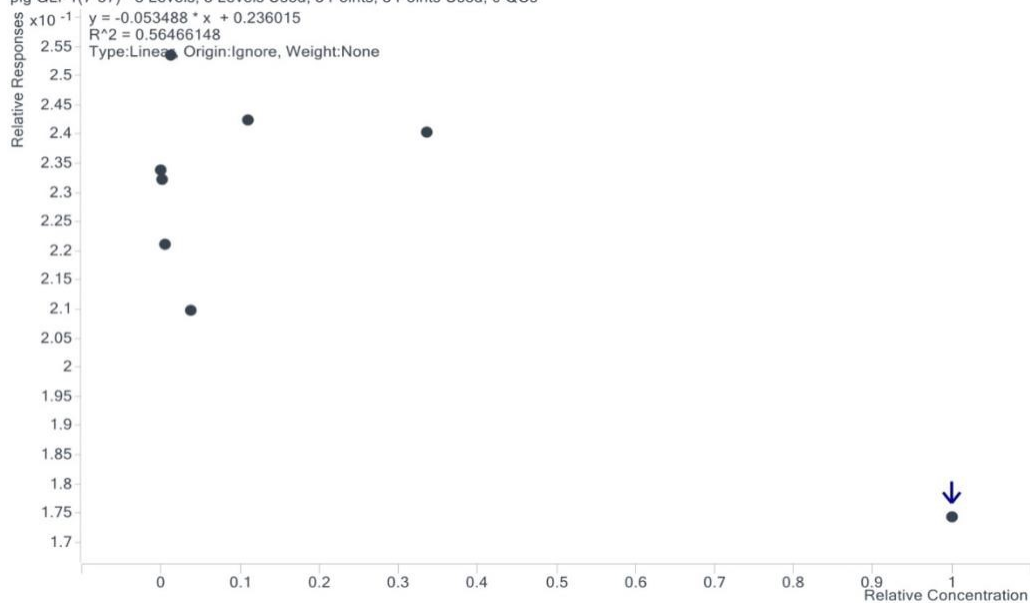

E) pig insulin - 8 Levels, 8 Levels Used, 8 Points, 8 Points Used, 0 QCs

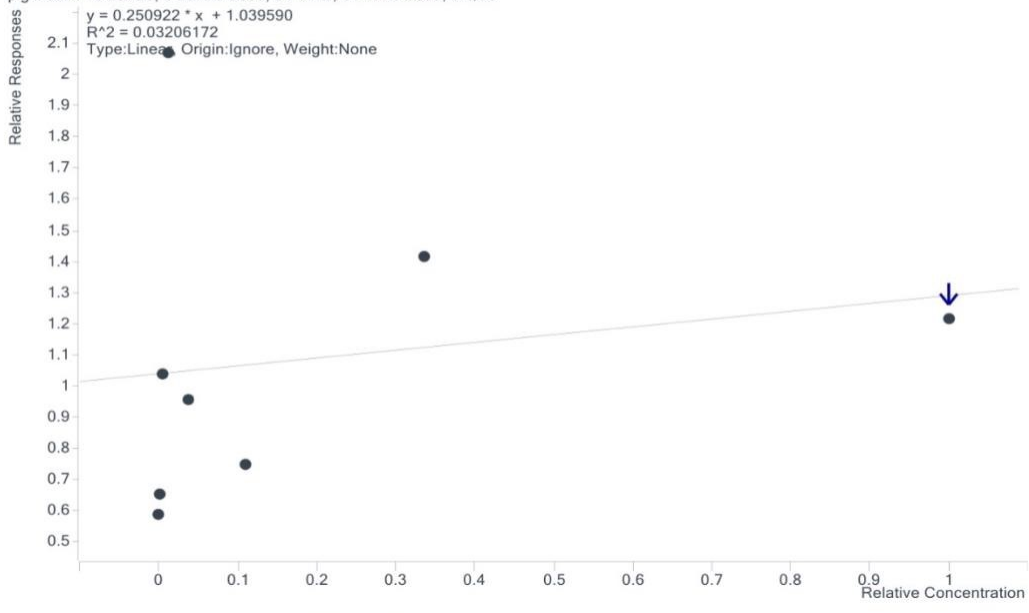

F) pig osteocalcin - 8 Levels, 8 Levels Used, 8 Points, 8 Points Used, 0 QCs

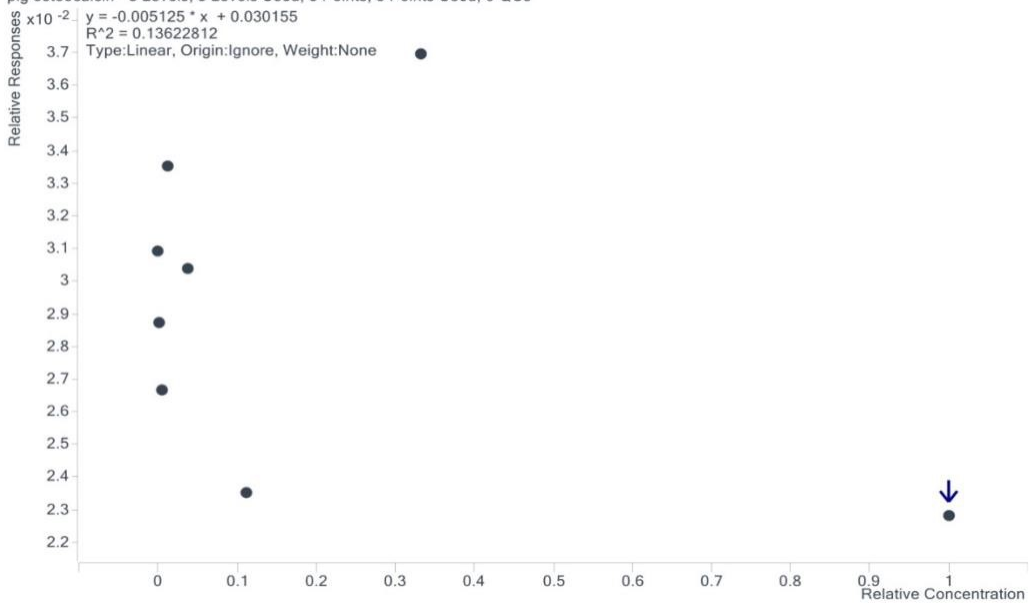

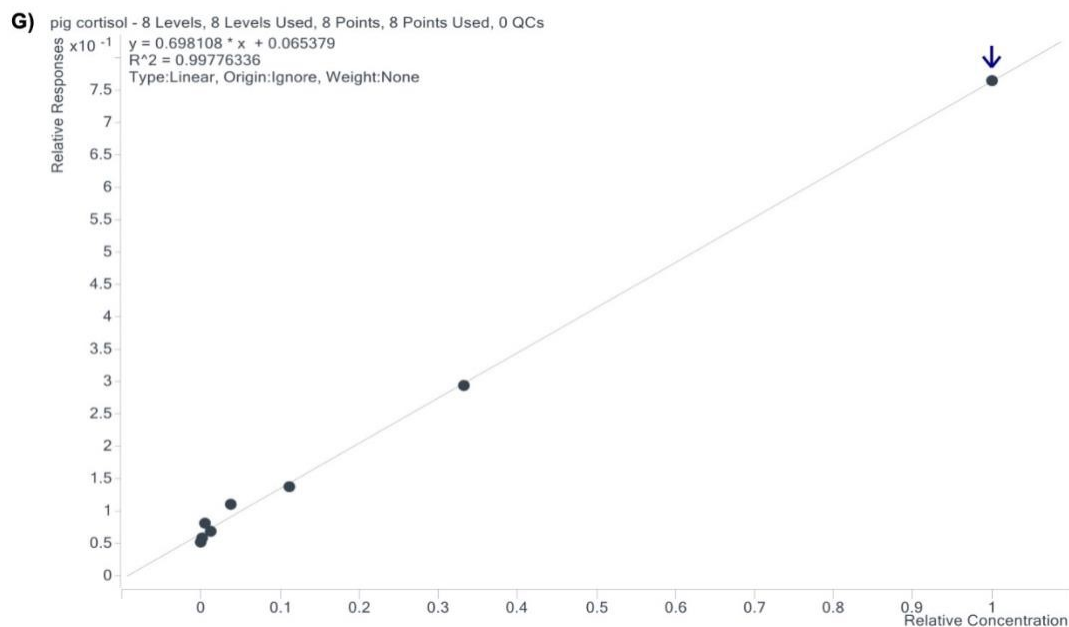

**Figure S8. Charcoal-stripped serum matrix calibration curves for analytes.** Eight calibrants were prepared in a charcoal stripped serum matrix. The peak area relative to internal standard was plotted against relative concentration. Plots are shown for (A) des-acyl and (B) acyl ghrelin, (C) GLP-1 (7-36), (D) GLP-1 (7-37), (E) insulin, (F)  $\gamma$ -carboxy osteocalcin, and (G) cortisol. Both GLP-1 (7-36) and GLP-1 (7-37), as well as insulin and osteocalcin demonstrated poor linearity in surrogate matrix.

**A)** pig deacyl ghrelin - 8 Levels, 7 Levels Used, 8 Points, 7 Points Used, 0 QCs  
 $y = 2.125922 * x^2 + 0.357038 * x - 0.001557$   
 $R^2 = 0.99985819$   
Type:Quadratic, Origin:Ignore, Weight:None

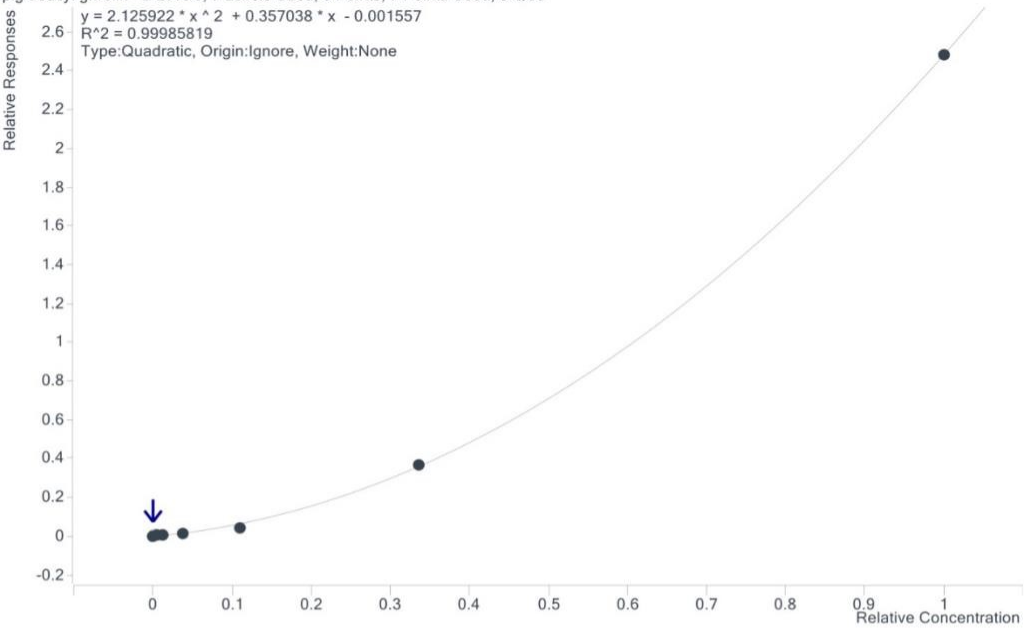

**B)** pig ghrelin - 8 Levels, 8 Levels Used, 8 Points, 8 Points Used, 0 QCs  
 $y = 1.857892 * x - 0.004552$   
 $R^2 = 0.99965047$   
Type:Linear, Origin:Ignore, Weight:None

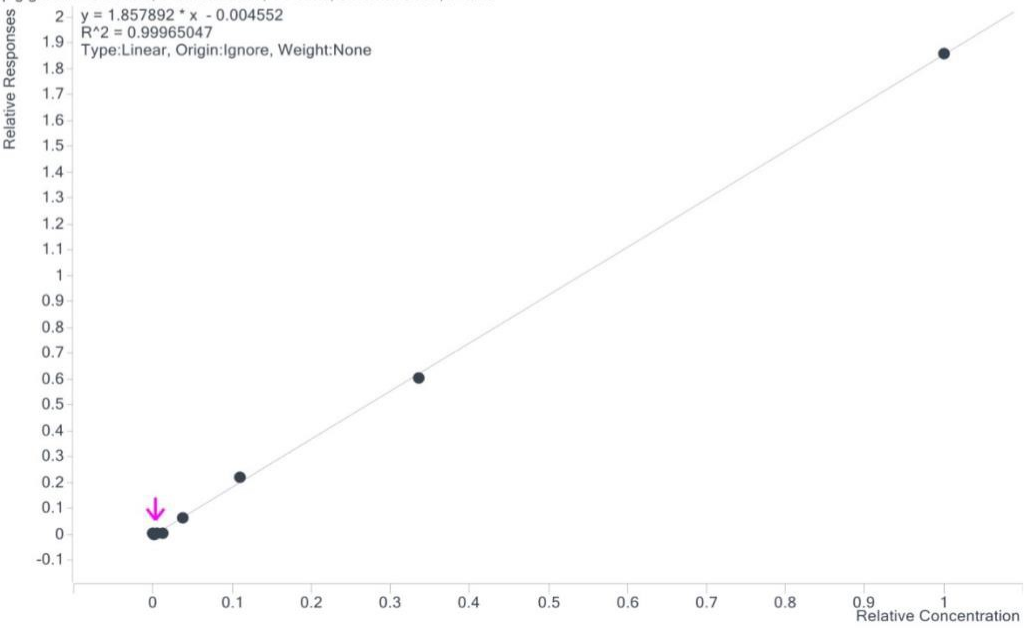

C) pig GLP1(7-36) - 8 Levels, 8 Levels Used, 8 Points, 8 Points Used, 0 QCs

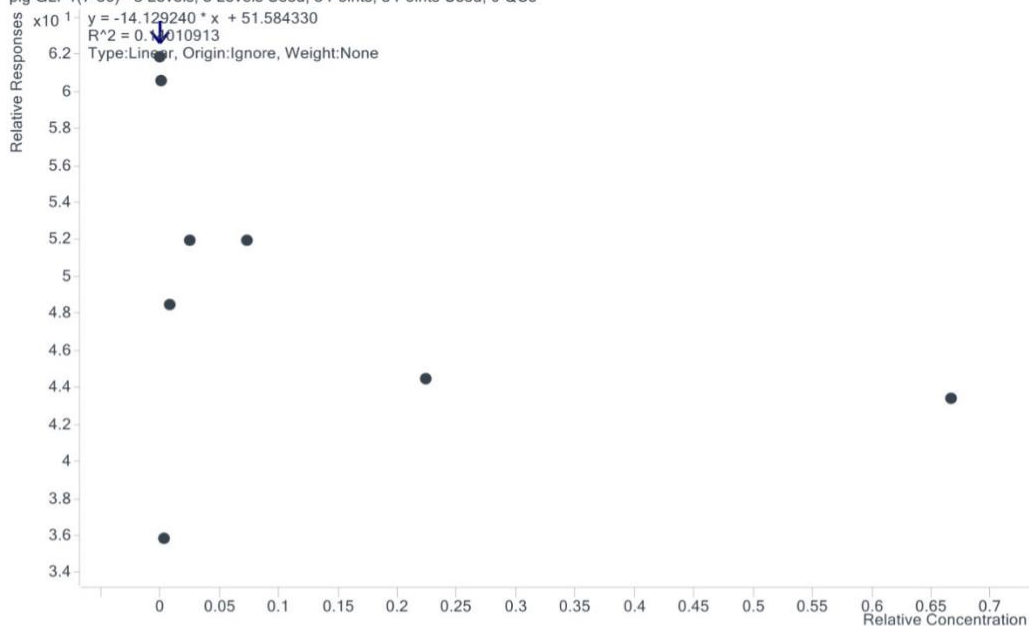

D) pig GLP1(7-37) - 8 Levels, 8 Levels Used, 8 Points, 8 Points Used, 0 QCs

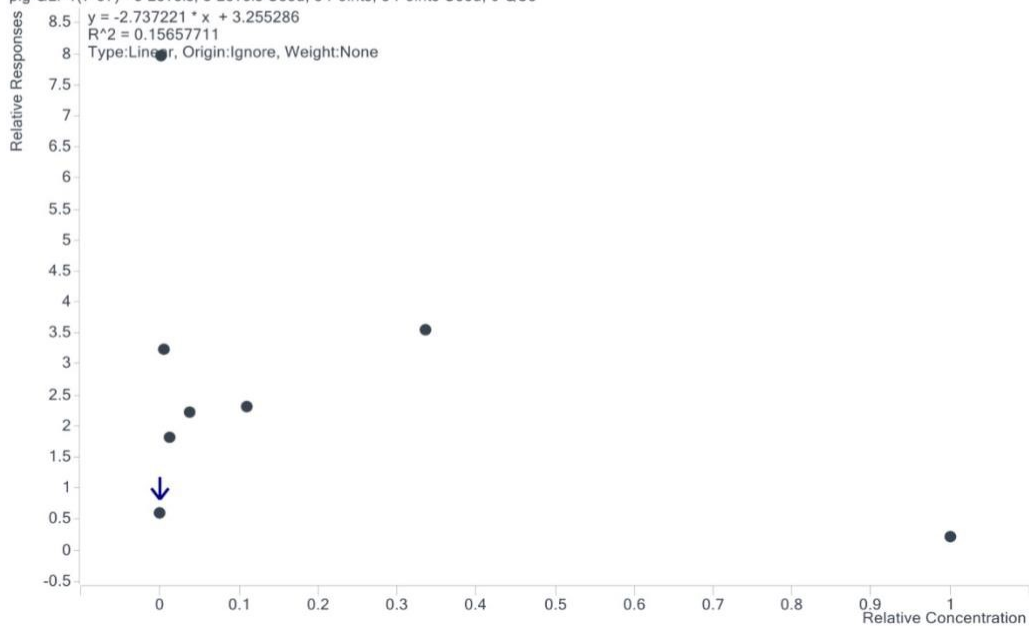

**E)**

pig insulin - 8 Levels, 8 Levels Used, 8 Points, 8 Points Used, 0 QCs

$y = 58.383465 * x + 3.559058$   
 $R^2 = 0.72869332$   
Type:Linear, Origin:Ignore, Weight:None

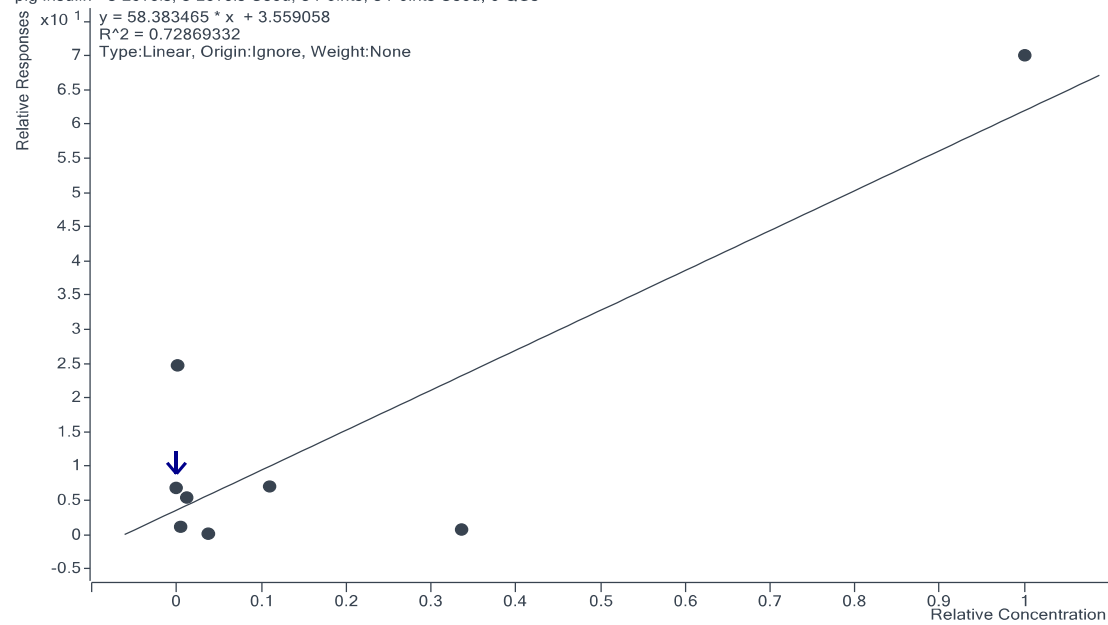

**F)**

pig osteocalcin - 8 Levels, 8 Levels Used, 8 Points, 8 Points Used, 0 QCs

$y = -0.005125 * x + 0.030155$   
 $R^2 = 0.13622812$   
Type:Linear, Origin:Ignore, Weight:None

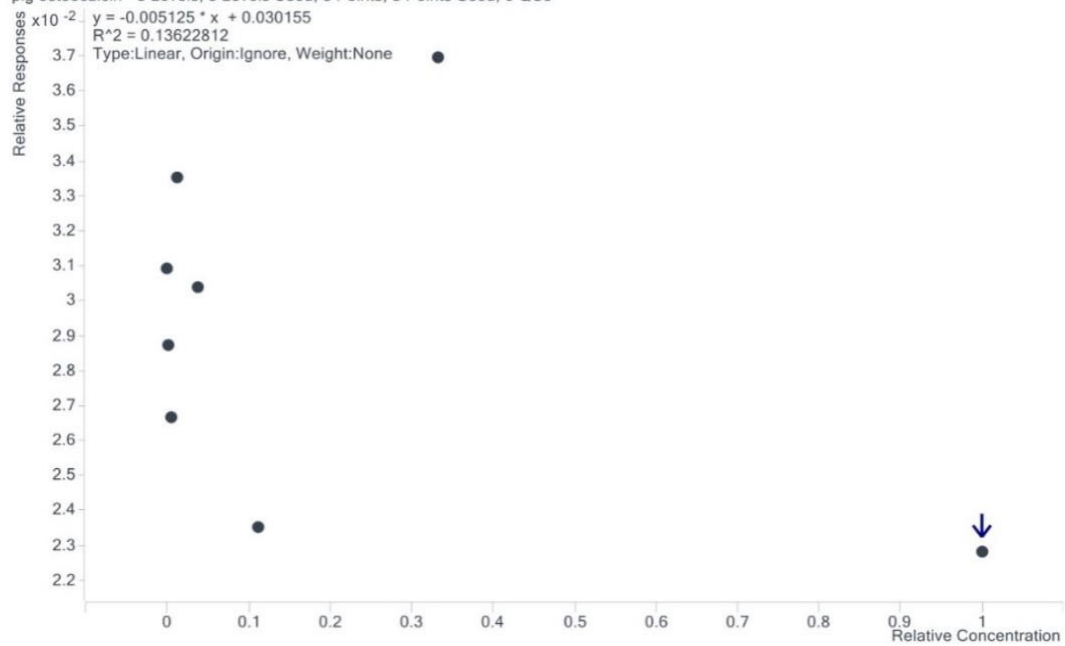

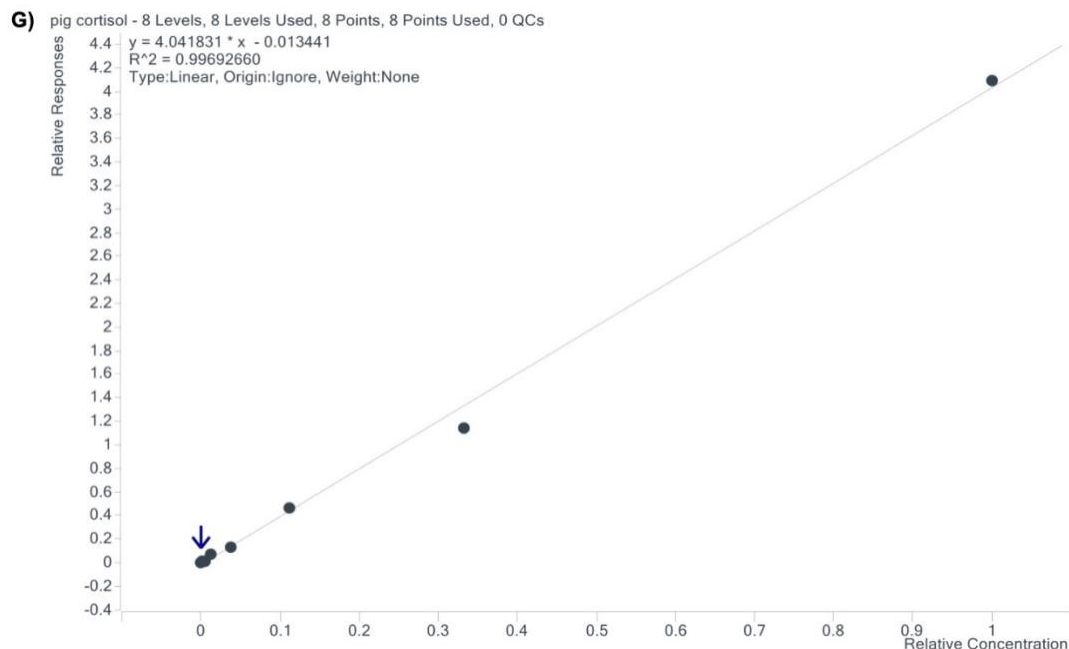

**Figure S9. Chicken serum matrix calibration lines for analytes.** Eight calibrants were prepared in a surrogate matrix of chicken serum extract. The peak area relative to internal standard was plotted against relative concentration. Plots are shown for (A) des-acyl and (B) acyl ghrelin, (C) GLP-1 (7-36), (D) GLP-1 (7-37), (E) insulin, (F)  $\gamma$ -carboxy osteocalcin, and (G) cortisol. GLP-1 (7-36), GLP-1 (7-37), insulin, and osteocalcin each demonstrated poor linearity in chicken serum.

**A)** pig deacyl ghrelin - 10 Levels, 9 Levels Used, 10 Points, 9 Points Used, 0 QCs

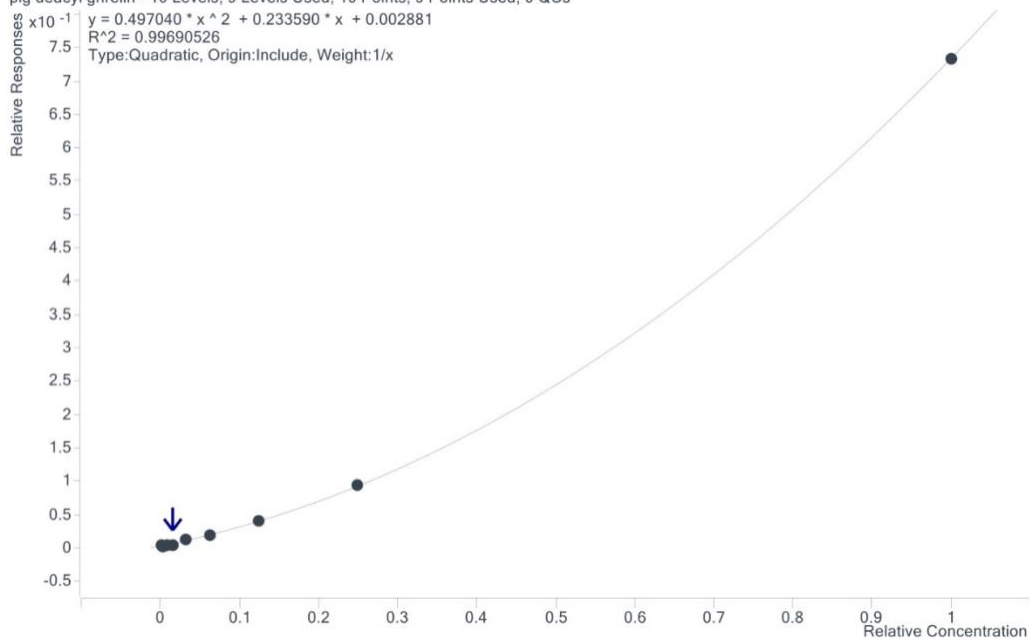

**B)** pig ghrelin - 10 Levels, 9 Levels Used, 10 Points, 9 Points Used, 0 QCs

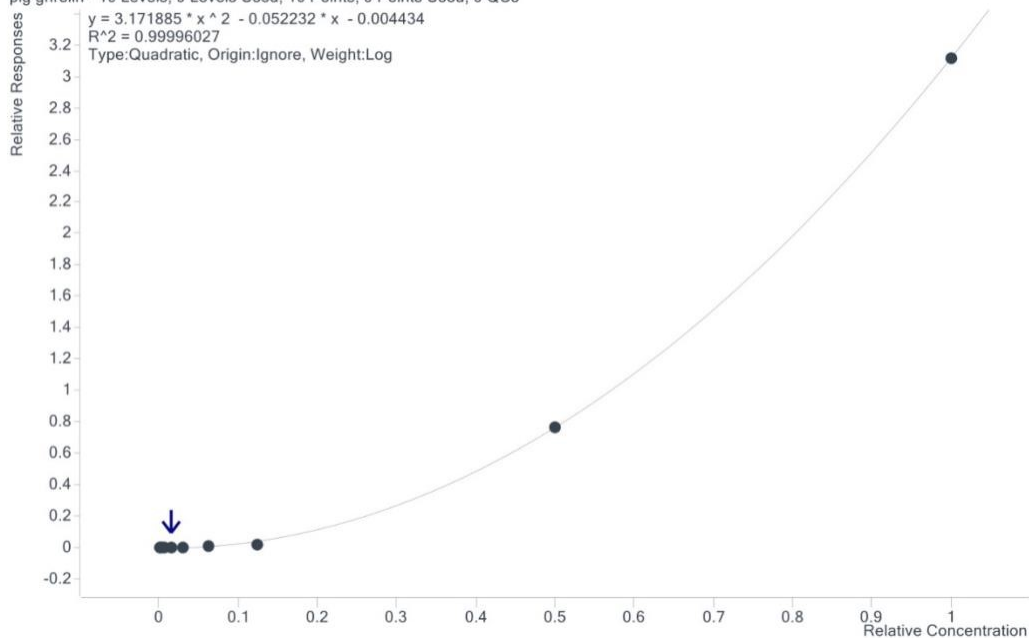

**C)** pig GLP1(7-36) - 10 Levels, 6 Levels Used, 10 Points, 6 Points Used, 0 QCs

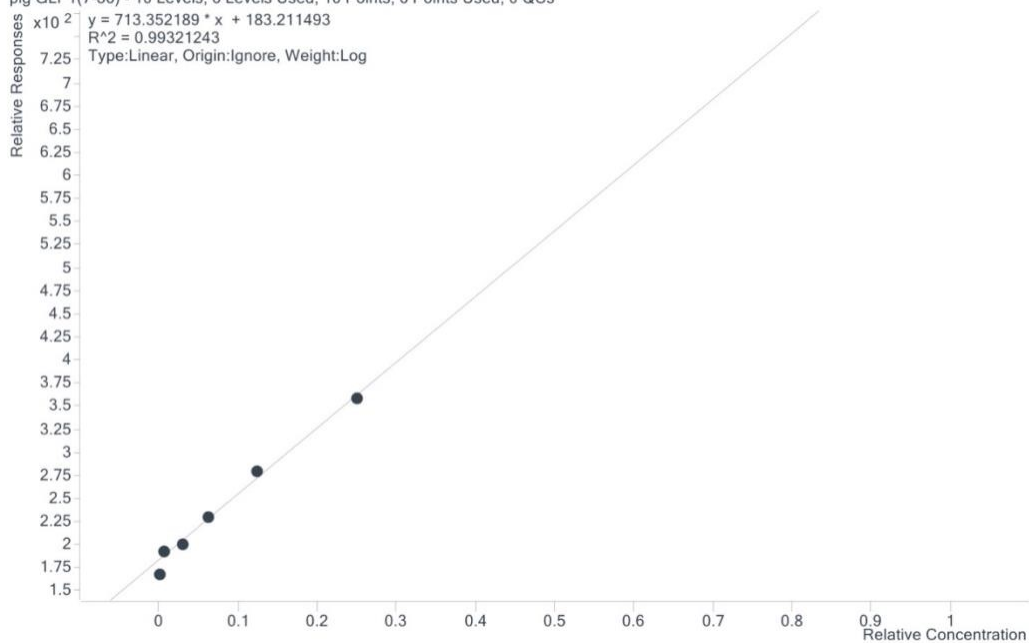

**D)** pig GLP1(7-37) - 10 Levels, 5 Levels Used, 10 Points, 5 Points Used, 0 QCs

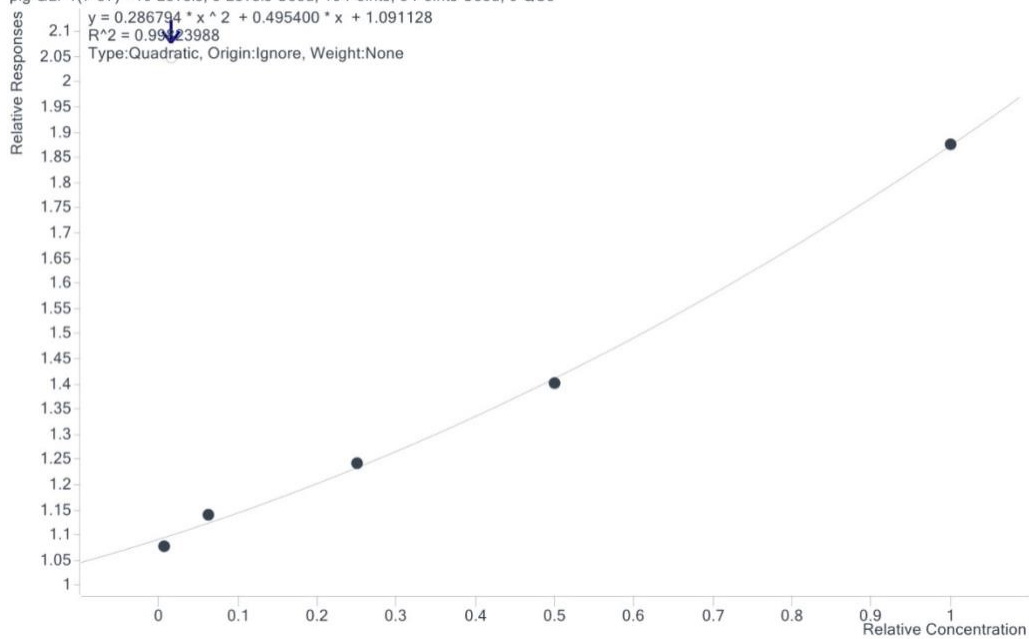

**E)** pig insulin - 10 Levels, 5 Levels Used, 10 Points, 5 Points Used, 0 QCs

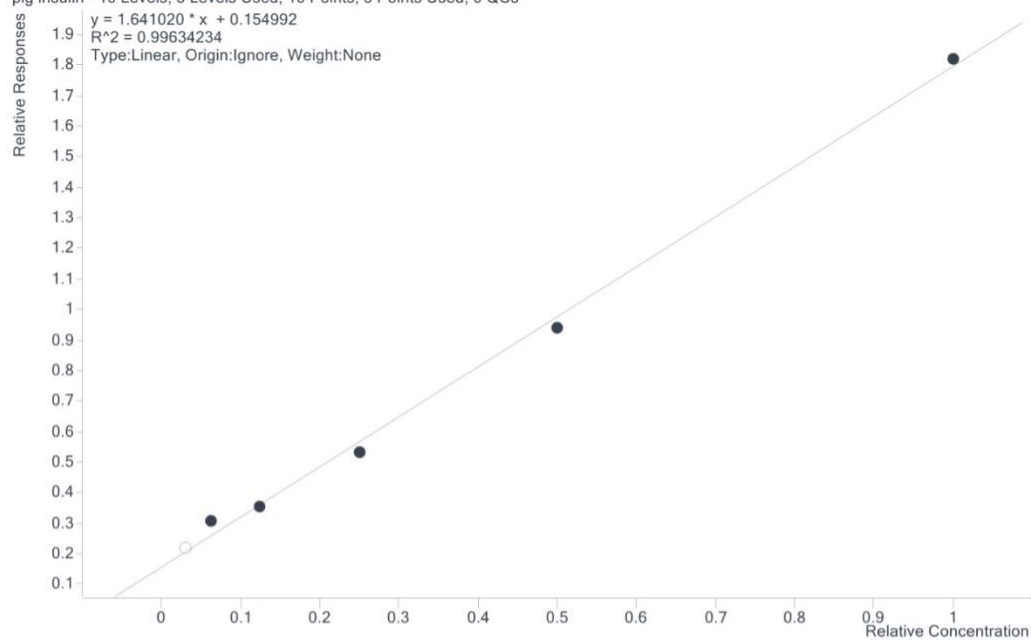

**F)** pig osteocalcin - 10 Levels, 6 Levels Used, 10 Points, 6 Points Used, 0 QCs

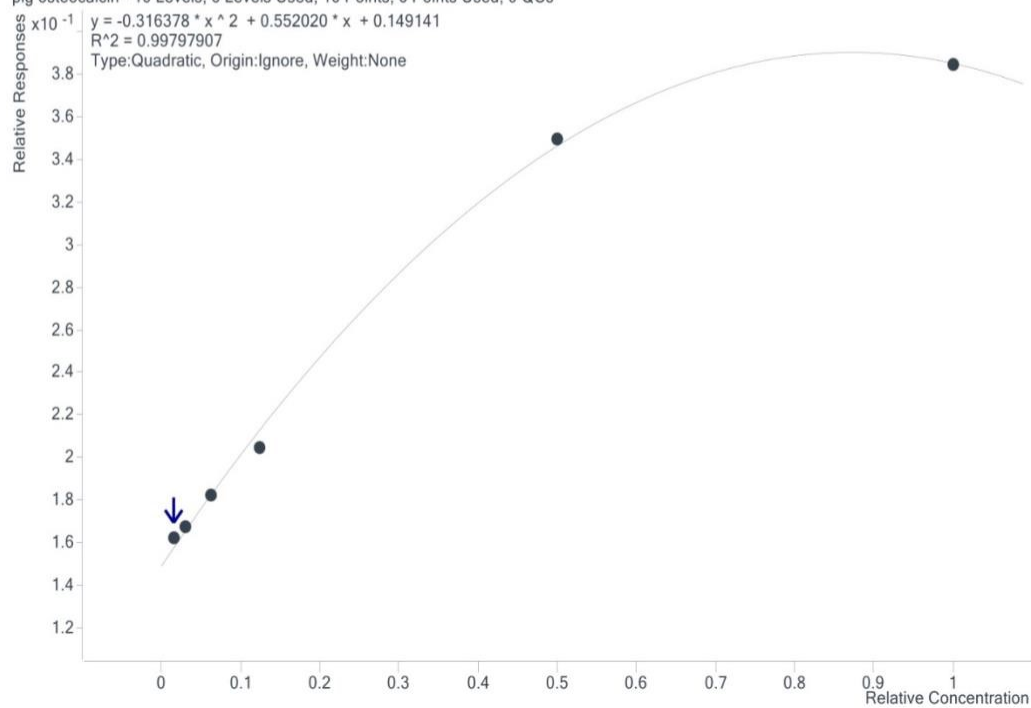

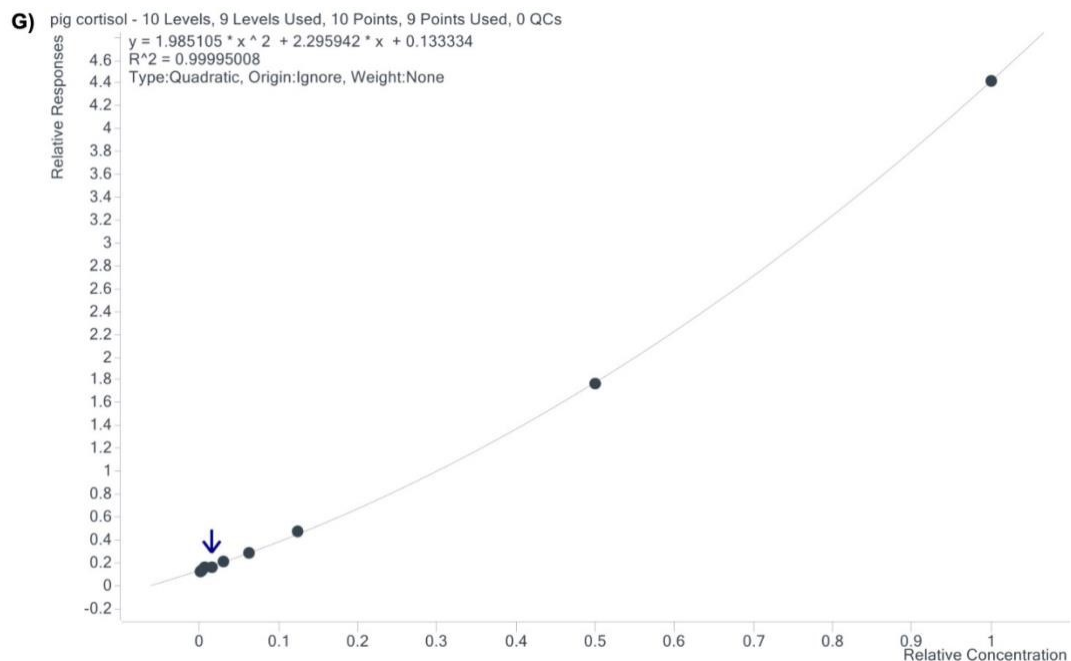

**Figure S10. Composite piglet serum matrix calibration lines for analytes.** Five to nine calibrants were prepared in a piglet serum extract matrix comprised of 40% filtered serum and 60% unfiltered serum. The peak area relative to internal standard was plotted against relative concentration. Plots are shown for (A) des-acyl and (B) acyl ghrelin, (C) GLP-1 (7-36), (D) GLP-1 (7-37), (E) insulin, (F) osteocalcin, and (G) cortisol. All analytes demonstrated linear or quadratic  $R^2 \geq 0.993$ .
